# Supplementary material for: Predicting stimulation-dependent enhancer-promoter interactions from ChIP-Seq time course data
Source: PubMed Central journal article supplement (PMC5623311; doi:10.7717/peerj.3742), 2017-09-28
Supplement: peerj-05-3742-s010.pdf [file peerj-05-3742-s010.pdf]

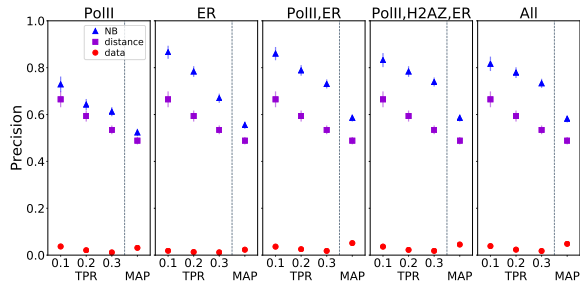

(a) training data performance

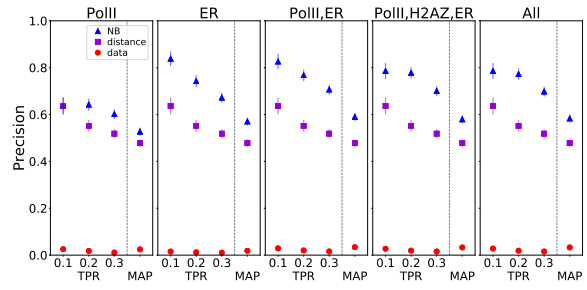

(b) test data performance

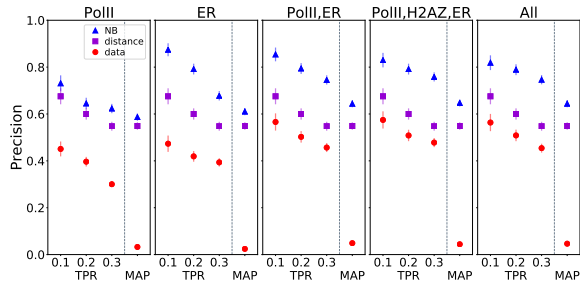

(c) training data intra-genic

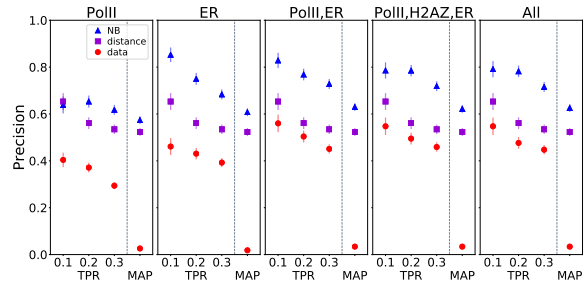

(d) test data intra-genic

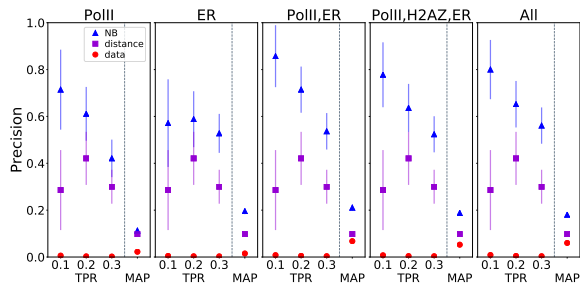

(e) training data inter-genic

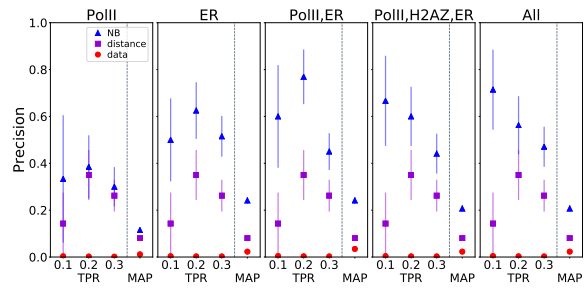

(f) test data inter-genic
