# Supplementary material for: Predicting stimulation-dependent enhancer-promoter interactions from ChIP-Seq time course data
Source: PubMed Central journal article supplement (PMC5623311; doi:10.7717/peerj.3742), 2017-09-28

### Overall performance

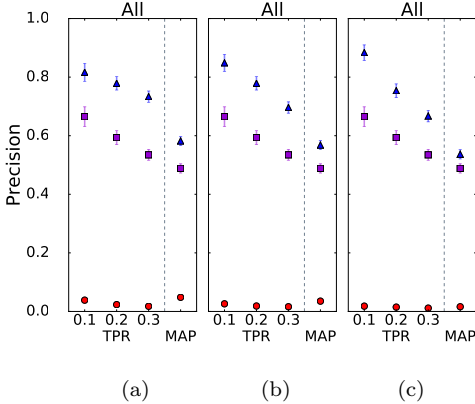

Supplement: peerj-05-3742-s012.pdf [file peerj-05-3742-s012.pdf]
